# Supplementary material for: Healthcare, Sickness Absence, and Disability Pension Cost Trajectories in the First 5 Years After Diagnosis with Multiple Sclerosis: A Prospective Register-Based Cohort Study in Sweden
Source: PubMed Central journal article supplement — Pharmacoecon Open. 2019 Jun 11;4(1):91–103. doi: 10.1007/s41669-019-0150-3 (PMC7018869; doi:10.1007/s41669-019-0150-3), 2019-06-11
Supplement: 41669_2019_150_MOESM1_ESM.pdf [file 41669_2019_150_MOESM1_ESM.pdf]

## **SUPPLEMENTARY MATERIAL**

**Journal: Pharmacoconomics – Open**

**Article:** Healthcare, Sickness Absence, and Disability Pension Cost Trajectories in the First 5 Years After Diagnosis with Multiple Sclerosis: A Prospective Register-Based Cohort Study in Sweden

**Authors:** Korinna Karampampa<sup>1</sup>, Hanna Gyllensten<sup>1,2</sup>, Fei Yang<sup>1</sup>, Chantelle Murley<sup>1</sup>, Emilie Friberg<sup>1</sup>, Jan Hillert<sup>1</sup>, Kristina Alexanderson<sup>1</sup>

**Affiliations:**

<sup>1</sup>Department of Clinical Neuroscience, Karolinska Institutet, SE-171 77 Stockholm, Sweden

<sup>2</sup>Institute of Health and Care Sciences, University of Gothenburg, SE-405 30 Gothenburg, Sweden

**Corresponding author:**

Korinna Karampampa, MSc, PhD

Division of Insurance Medicine, Department of Clinical Neuroscience

Karolinska Institutet, SE-171 77 Stockholm, Sweden

E-mail: [korinna.karampampa@ki.se](mailto:korinna.karampampa@ki.se)

Figure 1: Cost components as % of total costs, average across all years and cohorts

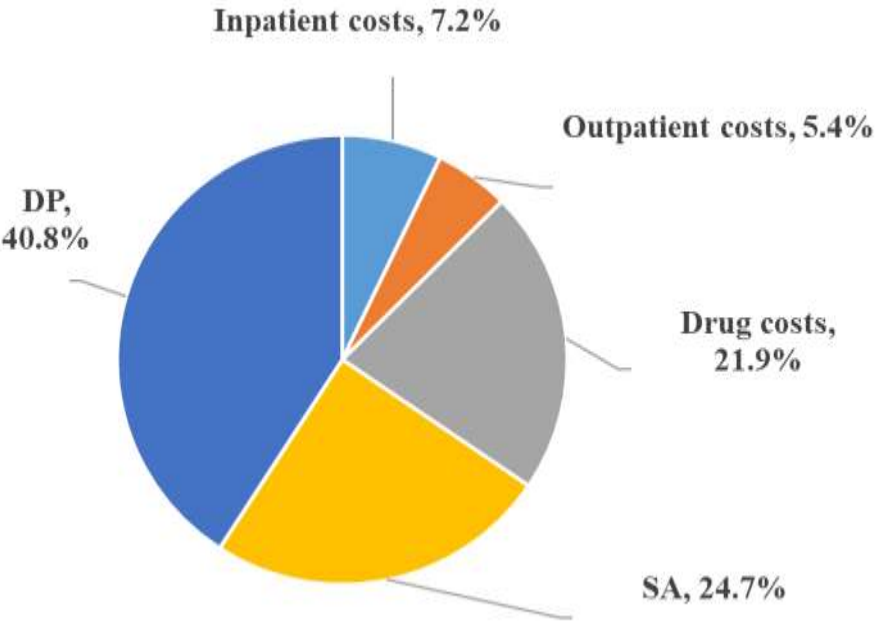

Abbreviations: DP = disability pension; SA = sickness absence.

Figure 2a-b: Change in the mean, annual, per patient, direct and indirect costs, by year of MS diagnosis (four study cohorts)

a) Direct costs

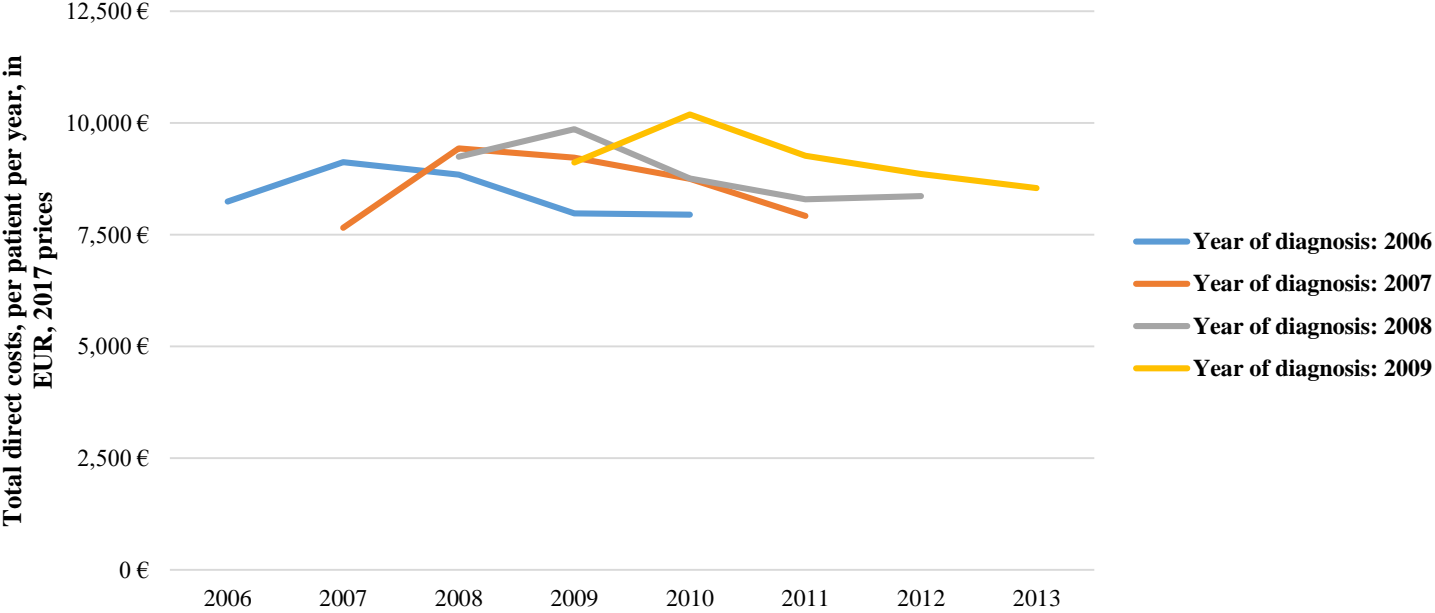

b) Indirect costs

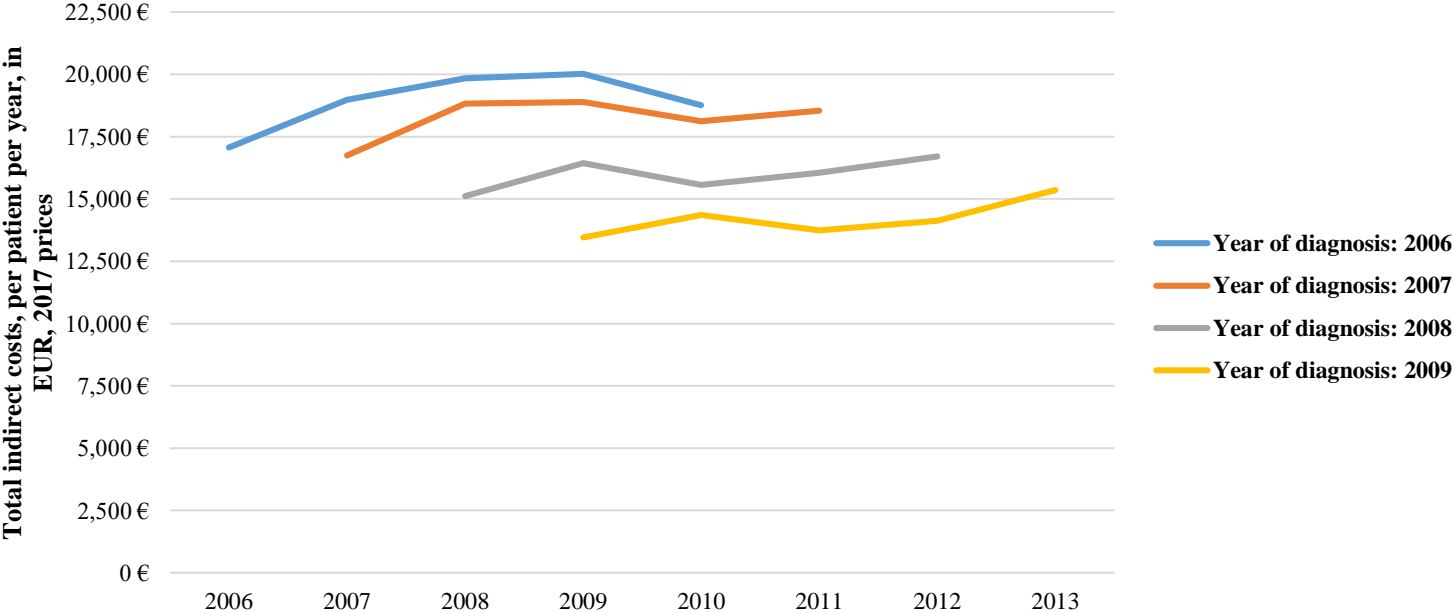

Figure 3: Estimated direct and indirect cost trajectories, for the 2007 (3a-b) and 2008 (3c-d) study cohorts, separately, during the 5-year follow-up; dotted lines present the 95% confidence intervals

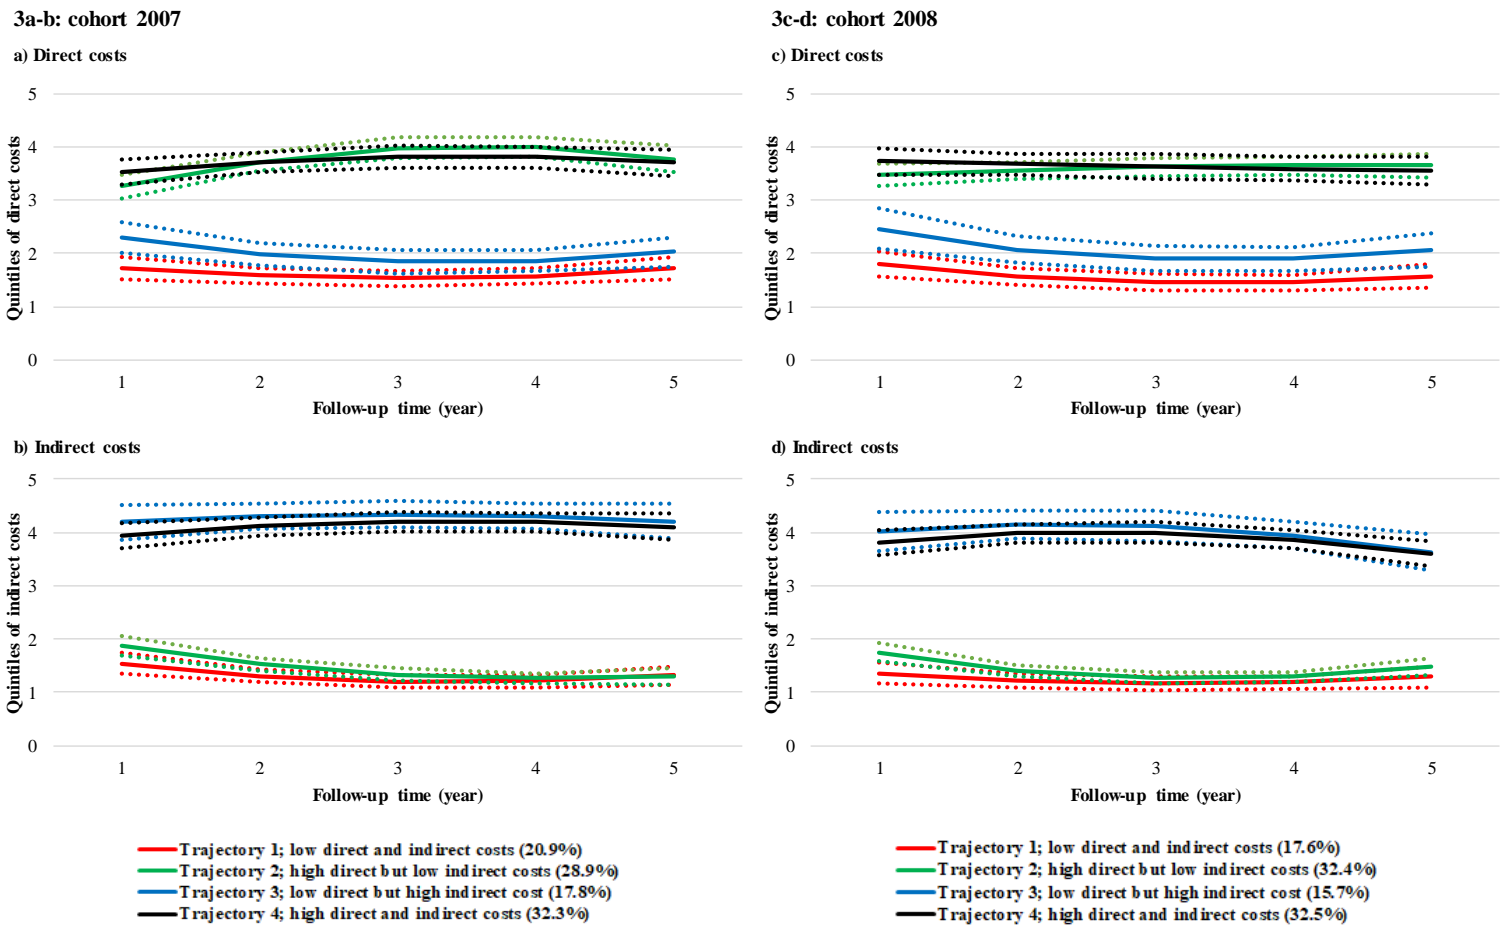

**Note 1:** The values 0 to 1 in the y-axis denote the 1st quintile (0-20% of observations), 1 to 2 the 2nd (20 to 40% of observations), 2 to 3 the 3rd (40 to 60% of observations), 3 to 4 the 4th (60 to 80% of observations), and 4 to 5 the 5th quintile (80 to 100% of observations). Each included individual with MS is classified for each year of follow up into the respective quintile for direct and indirect costs, i.e. individuals can be classified in different quintiles for each year of follow-up. For example, an individual diagnosed with MS in 2007, may be in the 2nd (between 20% and 40% of observations) quintile in 2007 when it comes to direct costs, while in the 3rd quintile regarding indirect costs.

**Note 2:** Trajectories represent clusters (sub-groups) of people with MS that have a similar likelihood for belonging to the identified quintiles of costs, over time (up to five years after diagnosis).

Figure 4: Model parameters of the final model selected for the group-based multitrajectory model that was used in the trajectory analysis. Output from the statistical software SAS, using the command *proc traj*.

| Maximum Likelihood Estimates                                             |           |           |                |                          |           |
|--------------------------------------------------------------------------|-----------|-----------|----------------|--------------------------|-----------|
| Model: Zero Inflated Poisson (ZIP)                                       |           |           |                |                          |           |
| Group                                                                    | Parameter | Estimate  | Standard Error | T for H0:<br>Parameter=0 | Prob >  T |
| 1                                                                        | Intercept | 0.43503   | 0.03312        | 13.136                   | 0.0000    |
|                                                                          | Linear    | -0.21047  | 0.03930        | -5.356                   | 0.0000    |
|                                                                          | Quadratic | 0.04455   | 0.00951        | 4.687                    | 0.0000    |
| 2                                                                        | Intercept | 0.56925   | 0.02440        | 23.335                   | 0.0000    |
|                                                                          | Linear    | -0.25932  | 0.02982        | -8.697                   | 0.0000    |
|                                                                          | Quadratic | 0.05032   | 0.00726        | 6.934                    | 0.0000    |
| 3                                                                        | Intercept | 1.41251   | 0.02236        | 63.168                   | 0.0000    |
|                                                                          | Linear    | 0.02549   | 0.02479        | 1.028                    | 0.3039    |
|                                                                          | Quadratic | -0.00714  | 0.00591        | -1.207                   | 0.2274    |
| 4                                                                        | Intercept | 1.34938   | 0.01616        | 83.519                   | 0.0000    |
|                                                                          | Linear    | 0.04061   | 0.01784        | 2.276                    | 0.0228    |
|                                                                          | Quadratic | -0.00916  | 0.00426        | -2.151                   | 0.0315    |
|                                                                          | Alpha0    | -21.79028 | 805.60059      | -0.027                   | 0.9784    |
|                                                                          | Alpha1    | -0.34962  | 432.69648      | -0.001                   | 0.9994    |
| Group membership                                                         |           |           |                |                          |           |
| 1                                                                        | (%)       | 19.87937  | 0.84741        | 23.459                   | 0.0000    |
| 2                                                                        | (%)       | 31.84896  | 0.99548        | 31.993                   | 0.0000    |
| 3                                                                        | (%)       | 16.05601  | 1.19204        | 13.469                   | 0.0000    |
| 4                                                                        | (%)       | 32.21566  | 1.32600        | 24.295                   | 0.0000    |
| BIC=-54889.74 (N=32374) BIC=-54854.21 (N=3272) AIC=-54759.77 L=-54728.77 |           |           |                |                          |           |
